# Supplementary material for: A clinical-grade liquid biomarker detects neuroendocrine differentiation in prostate cancer
Source: JCI journal article supplement (doi:10.1172/jci161858), 2022-10-31
Supplement: sd1 [file 1]

301 Moved Permanently

# Moved Permanently

The document has moved here.
